# Supplementary material for: Heart Failure Emergency Readmission Prediction Using Stacking Machine Learning Model
Source: MDPI journal article supplement (doi:10.3390/diagnostics13111948), 2023-06-02
Supplement: s1 [file s1]

## Supplementary Materials

**Supplementary Table S1:** Ranked 15 features using XGB model.

| Ranking | Name of the Feature                        |
|---------|--------------------------------------------|
| 1       | Admission way                              |
| 2       | LACE score                                 |
| 3       | Reduced Hemoglobin                         |
| 4       | Type of Heart Failure                      |
| 5       | Occupation                                 |
| 6       | Mitral Valve EMS                           |
| 7       | CCI score                                  |
| 8       | White globulin ratio                       |
| 9       | Discharge Day                              |
| 10      | Discharge Department                       |
| 11      | Mean Hemoglobin Volume                     |
| 12      | NYHA Cardiac Function Classification       |
| 13      | Partial Pressure of CO2                    |
| 14      | Left Ventricular End Diastolic Diameter LV |
| 15      | Measure Residual Base                      |

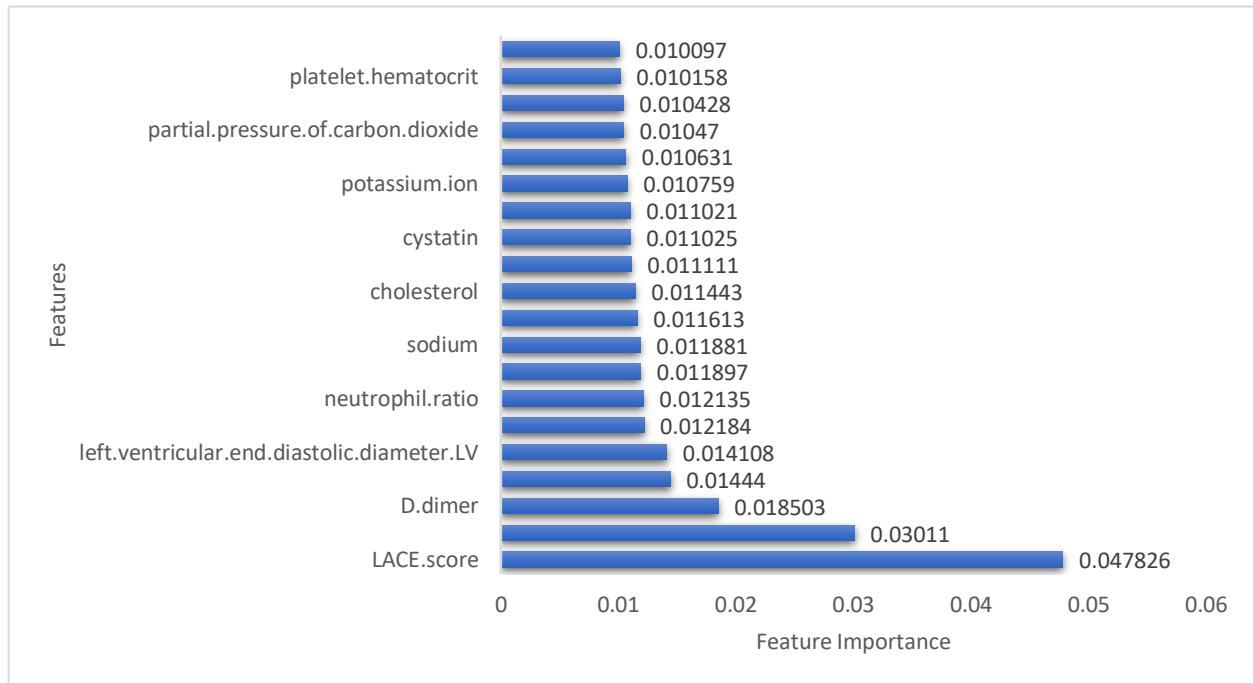

**Supplementary Figure S1:** Feature ranking using Random Forest.

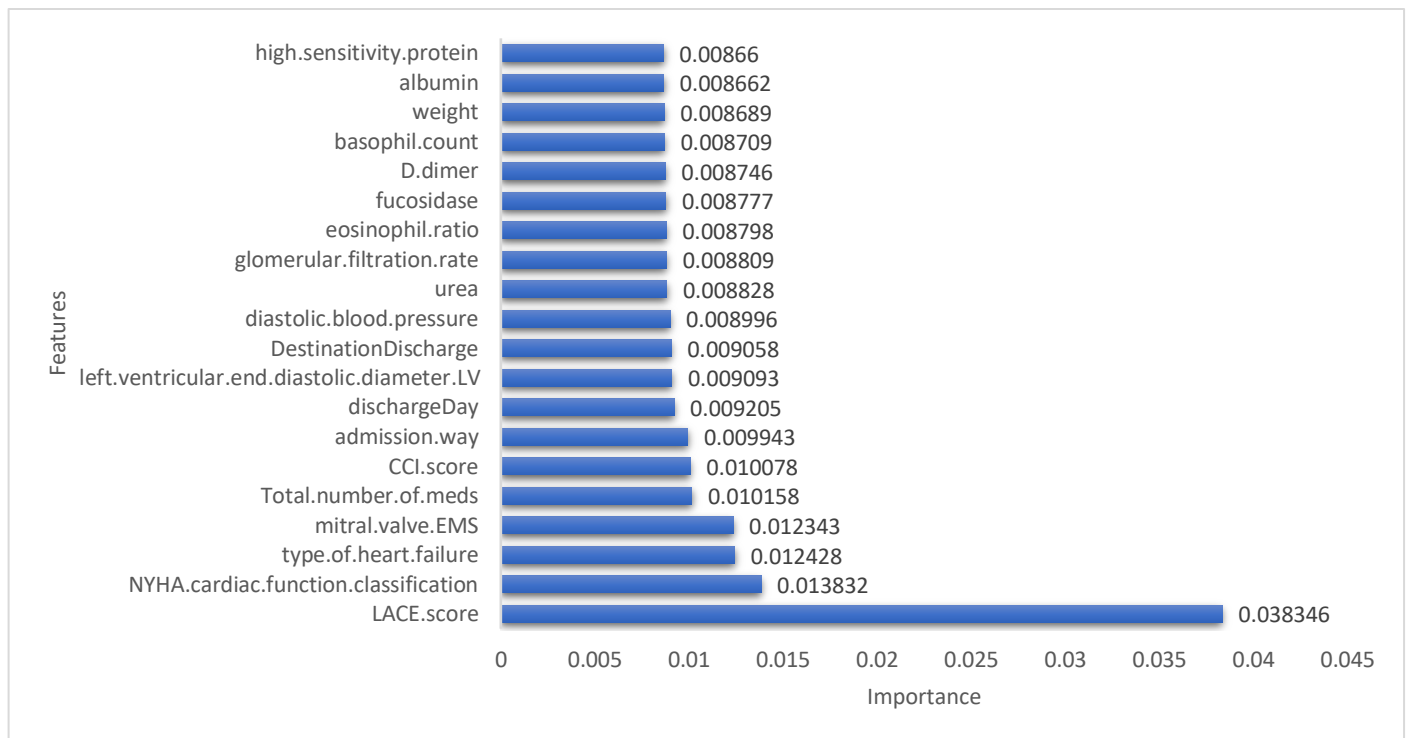

**Supplementary Figure S2:** Feature Ranking using Extra Tree.
